# Supplementary material for: Biogeographical venom variation in the Indian spectacled cobra (Naja naja) underscores the pressing need for pan-India efficacious snakebite therapy
Source: PLOS journal article supplement (doi:10.1371/journal.pntd.0009150), 2021-02-18
Supplement: S6 (10.1371/journal.pntd.0009150.s006) [file journal.pntd.0009150.s006]

## Supplementary Tables

**Table S1A.** Details of the *N. naja* venom samples tested

| Sample ID | Sampling location                                     | Biogeographical Zone | No. of individuals | Protein Content |
|-----------|-------------------------------------------------------|----------------------|--------------------|-----------------|
|           |                                                       |                      |                    | (mg/mL)         |
| NaNaPB01  | North India Nawanshahr, Punjab (PB)                   | Semiarid             | 5                  | 0.159           |
| NaNaTN01  | South India<br>Kancheepuram, Tamil Nadu (TN)          | Coastal              | *Multiple          | 0.360           |
| NaNaAP04  | Southeast India<br>Visakhapatnam, Andhra Pradesh (AP) | Coastal              | 1                  | 0.169           |
| NaNaWB05  | East India<br>Kolkata, West Bengal (WB)               | Gangetic plains      | 1                  | 0.149           |
| NaNaRJ01  | West India Bikaner, Rajasthan (RJ)                    | Desert               | 1                  | 0.112           |
| NaNaMH07  | West India Mahad, Maharashtra (MH)                    | Western Ghats        | 4                  | 0.563           |
| NaNaMP03  | Central India<br>Jabalpur, Madhya Pradesh (MP)        | Deccan peninsula     | 1                  | 0.135           |

This table shows the sampling locations of *N. naja* venoms from various biogeographic zones in the country. The total number of individual snakes from which the venoms were collected, and their respective venom protein concentrations have also been presented.

\* This venom was sourced from the Irula Snake Catchers Industrial Cooperative Society and, hence, is likely pooled from multiple individuals.

**Table S1B.** Details of the investigated commercial Indian antivenoms

| Manufacturer                                       | Batch          | Manufacture (M) and expiry (E) dates   | Protein content | Marketed neutralizing efficacy                                                                                 |
|----------------------------------------------------|----------------|----------------------------------------|-----------------|----------------------------------------------------------------------------------------------------------------|
|                                                    |                |                                        | (mg/ml)         | (mg/ml)                                                                                                        |
| <b>Bharat Serums and Vaccines Ltd.</b>             | A05318087      | <b>M:</b> 10/2018<br><b>E:</b> 09/2022 | 26.5 ± 0.77     | <i>N. naja</i> : 0.60<br><i>B. caeruleus</i> : 0.45<br><i>D. russelii</i> : 0.60<br><i>E. carinatus</i> : 0.45 |
| <b>Haffkine BioPharmaceutical Corporation Ltd.</b> | AS180611       | <b>M:</b> 06/2018<br><b>E:</b> 11/2022 | 24.7± 0.5       |                                                                                                                |
| <b>Premium Serums &amp; Vaccines Pvt. Ltd.</b>     | ASVS(I)-Lyo013 | <b>M:</b> 11/2018<br><b>E:</b> 11/2022 | 26.2± 1.2       |                                                                                                                |
| <b>VINS Bioproducts Ltd.</b>                       | 01AS18067      | <b>M:</b> 11/2018<br><b>E:</b> 10/2022 | 31.4 ± 0.54     |                                                                                                                |

This table shows the details of commercial Indian antivenoms used in this study. Batch numbers, manufacturing and expiration dates, protein concentrations of the vials as estimated by Bradford method, and the marketed neutralisation potencies against the 'big four' snakes have also been shown here.
